# Supplementary material for: The role of retinoic acid signaling in starfish metamorphosis
Source: PubMed Central journal article supplement (PMC5910596; doi:10.1186/s13227-018-0098-x), 2018-04-21

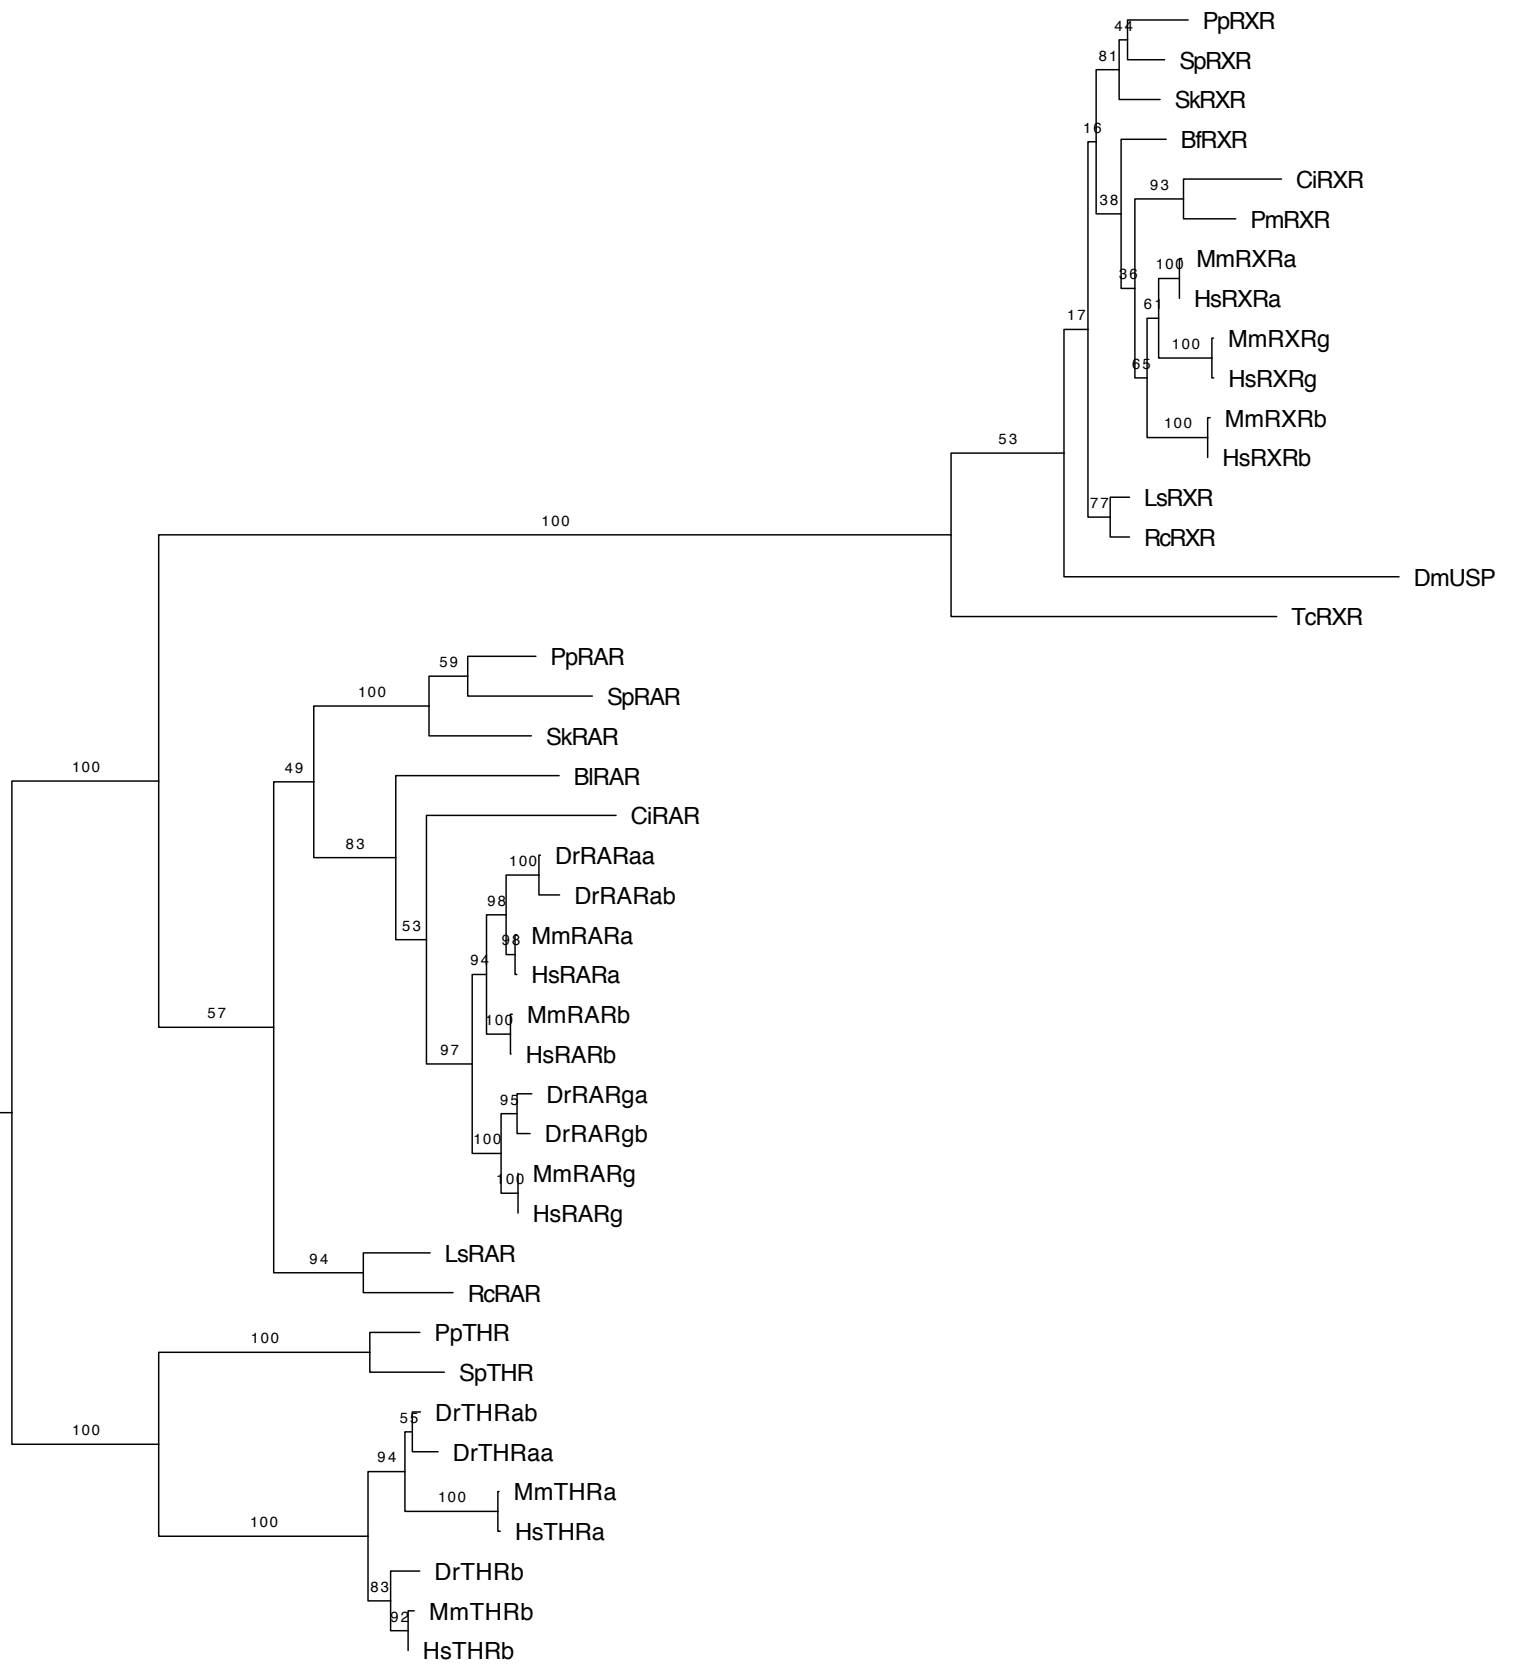

Supplement: 13227_2018_98_MOESM2_ESM.pdf [file 13227_2018_98_MOESM2_ESM.pdf]
