# Supplementary material for: The role of retinoic acid signaling in starfish metamorphosis
Source: PubMed Central journal article supplement (PMC5910596; doi:10.1186/s13227-018-0098-x), 2018-04-21
Supplement: 13227_2018_98_MOESM3_ESM.pdf [file 13227_2018_98_MOESM3_ESM.pdf]

|    | gene/entry                                                                                                  |                                                                                                          | gene/entry                                                                                                           |                                                                              |                                                                     |
|----|-------------------------------------------------------------------------------------------------------------|----------------------------------------------------------------------------------------------------------|----------------------------------------------------------------------------------------------------------------------|------------------------------------------------------------------------------|---------------------------------------------------------------------|
| Hs | <i>aldh1a1</i><br><i>aldh1a2</i><br><i>aldh1a3</i><br><i>aldh1b1</i><br><i>aldh2</i>                        | P00352.2<br>O94788<br>P47895<br>P30837<br>P05091                                                         | <i>thra</i><br><i>thrb</i><br><i>rara</i><br><i>rarb</i><br><i>rarg</i><br><i>rxra</i><br><i>rxrb</i><br><i>rxrg</i> | P10827<br>P10828<br>P10276<br>P10826<br>P13631<br>P19793<br>P28702<br>P48443 | Hs; <i>Homo sapiens</i> (Human)                                     |
| Mm | <i>aldh1a1</i><br><i>aldh1a2</i><br><i>aldh1a3</i><br><i>aldh1b1</i><br><i>aldh2</i>                        | P24549<br>Q62148<br>Q9JHW9<br>Q9CZS1<br>P47738                                                           | <i>thra</i><br><i>thrb</i><br><i>rara</i><br><i>rarb</i><br><i>rarg</i><br><i>rxra</i><br><i>rxrb</i><br><i>rxrg</i> | P63058<br>P37242<br>P11416<br>P22605<br>P18911<br>P28700<br>P28704<br>P37238 | Mm; <i>Mus musculus</i> (Mouse)                                     |
| Xt | <i>aldh1a1</i><br><i>aldh1a2</i><br><i>aldh1a3</i><br><i>aldh1b1</i><br><i>aldh2</i>                        | Q4VBE1<br>Q9DEX5<br>F7BV06<br>F7DQF8<br>Q6DJ49                                                           |                                                                                                                      |                                                                              | Xt; <i>Xenopus tropicalis</i> (Western clawed frog)                 |
| Dr | <i>aldh1a2</i><br><i>aldh1a3</i><br><i>aldh2a</i><br><i>aldh2b</i>                                          | Q90XS8<br>Q0H2G3<br>Q8QGQ2<br>Q6TH48                                                                     | <i>thraa</i><br><i>thrab</i><br><i>thrb</i><br><i>raraa</i><br><i>rarab</i><br><i>rarga</i><br><i>rargb</i>          | Q98867<br>U3JAT9<br>Q9PVE4<br>Q90271<br>Q7ZTI3<br>Q91392<br>A2T928           | Dr; <i>Danio rerio</i> (Zebrafish)                                  |
| Bf | <i>aldh1a_1</i><br><i>aldh1a_2</i>                                                                          | C3ZGK4<br>C3ZG63                                                                                         | <i>rxr</i>                                                                                                           | Q8MX78                                                                       | Bf; <i>Branchiostoma floridae</i><br>(Florida lancelet) (Amphioxus) |
| Bl |                                                                                                             |                                                                                                          | <i>rar</i>                                                                                                           | O18608                                                                       | Bl; <i>Branchiostoma lanceolatum</i> (Common lancelet)              |
| Ci | <i>aldh1a_1</i><br><i>aldh1a_2</i><br><i>aldh1a_3</i><br><i>aldh2</i>                                       | A0A1W2WB51<br>A0A1W5BCT1<br>A0A1W2WDC1<br>A0A1W5B7N8                                                     | <i>rar</i><br><i>rxr</i>                                                                                             | Q4H2W1<br>Q4H2U9                                                             | Ci; <i>Ciona intestinalis</i> (Transparent sea squirt)              |
| Pm |                                                                                                             |                                                                                                          | <i>rxr</i>                                                                                                           | K7ZLP3                                                                       | Pm; <i>Polyandrocarpa misakiensis</i> (Tunicate)                    |
| Sk | <i>aldh1a_1</i><br><i>aldh1a_2</i><br><i>aldh1a_3</i><br><i>aldh1a_4</i><br><i>aldh1a_5</i><br><i>aldh2</i> | XP_006823779.1<br>XP_006822197.1<br>XP_002736989.1<br>XP_002731204.1<br>XP_006824634.1<br>XP_006816163.1 | <i>rar</i><br><i>rxr</i>                                                                                             | XP_002742241.1<br>D2XNK4                                                     | Sk; <i>Saccoglossus kowalevskii</i> (Acorn worm)                    |
| Sp | <i>aldh2_1</i><br><i>aldh2_2</i>                                                                            | SPU_007284<br>SPU_023801                                                                                 | <i>thr</i><br><i>rar</i><br><i>rxr</i>                                                                               | SPU_025239<br>SPU_016523<br>SPU_028422                                       | Sp; <i>Strongylocentrotus purpuratus</i><br>(Purple sea urchin)     |
| Pp | <i>raldha</i><br><i>raldha</i><br><i>raldha</i><br><i>aldh2</i>                                             | LC379260<br>LC379261<br>LC379262<br>*                                                                    | <i>rar</i><br><i>rxr</i><br><i>thr</i>                                                                               | LC379258<br>LC379259<br>*                                                    | Pp; <i>Patiria pectinifera</i> (starfish)                           |
| Dm |                                                                                                             |                                                                                                          | <i>usp</i>                                                                                                           | P20153                                                                       | Dm; <i>Drosophila melanogaster</i> (Fruit fly)                      |
| Rc |                                                                                                             |                                                                                                          | <i>rar</i><br><i>rxr</i>                                                                                             | T2HRZ4<br>E9RHD8                                                             | Rc; <i>Reishia clavigera</i> (Sea snail)                            |
| Ls |                                                                                                             |                                                                                                          | <i>rar</i><br><i>rxr</i>                                                                                             | D5LIR6<br>Q5I7G2                                                             | Ls; <i>Lymnaea stagnalis</i> (Great pond snail)                     |
| Tc |                                                                                                             |                                                                                                          | <i>rxr</i>                                                                                                           | O96562                                                                       | Tc; <i>Tripedalia cystophora</i> (Jellyfish)                        |

\* Sequences were not deposited to databank but available from supplementary dataset 1 or 2 of this work.
