# Supplementary material for: The role of retinoic acid signaling in starfish metamorphosis
Source: PubMed Central journal article supplement (PMC5910596; doi:10.1186/s13227-018-0098-x), 2018-04-21
Supplement: 13227_2018_98_MOESM4_ESM.pdf [file 13227_2018_98_MOESM4_ESM.pdf]

|               | Forward Primer (5'→3')         | Reverse Primer including T3 promoter region (5'→3') |
|---------------|--------------------------------|-----------------------------------------------------|
| <i>raldha</i> | CGAAATGGCTCCCCACAAGTCAAGTACAC  | <b>ATTAACCCTCACTAAAGGGAAAATGCTCTCGGAAATTCAA</b>     |
| <i>raldhb</i> | CCGACGTGGATATTGCTGTGAATGCTGCAA | <b>ATTAACCCTCACTAAAGGGACTAGGCCCATCCAATCAATG</b>     |
| <i>raldhc</i> | AATGAGTTCGTCAATTCCGTGAGCGGAAAG | <b>ATTAACCCTCACTAAAGGGATTGGGAATGTTGCTTGAACC</b>     |
| <i>rar</i>    | ATGAACATGAACATGAATCCTAATTACTCA | <b>ATTAACCCTCACTAAAGGGATTGGTTGTCGGCTCTGTCAA</b>     |
| <i>rxr</i>    | AACTGCATCGTGGACAAACGTCAGAGGAAT | <b>ATTAACCCTCACTAAAGGGAACCACAGACTGTTCCGATAC</b>     |
