# Supplementary material for: The role of retinoic acid signaling in starfish metamorphosis
Source: PubMed Central journal article supplement (PMC5910596; doi:10.1186/s13227-018-0098-x), 2018-04-21
Supplement: 13227_2018_98_MOESM5_ESM.pdf [file 13227_2018_98_MOESM5_ESM.pdf]

number of metamorphosed / treated larvae

| treatment       | batch 1 |       | batch 2 |       | batch 3 |       |
|-----------------|---------|-------|---------|-------|---------|-------|
|                 | +       | -     | +       | -     | +       | -     |
| RO, 3 $\mu$ M   |         |       |         |       |         |       |
| RA, 0.1 $\mu$ M | 6/20    | 18/20 | 0/20    | 17/20 | 0/20    | 17/20 |
| RA, 1 $\mu$ M   | 15/20   | 20/20 | 2/20    | 20/20 | 1/20    | 18/20 |
