# Supplementary material for: The role of retinoic acid signaling in starfish metamorphosis
Source: PubMed Central journal article supplement (PMC5910596; doi:10.1186/s13227-018-0098-x), 2018-04-21
Supplement: 13227_2018_98_MOESM6_ESM.pdf [file 13227_2018_98_MOESM6_ESM.pdf]

number of metamorphosed / settled larvae

| treatment     | batch 1 |       | batch 2 |       | batch 3 |       |
|---------------|---------|-------|---------|-------|---------|-------|
|               | 1       | 2     | 1       | 2     | 1       | 2     |
| RO, 1 $\mu$ M | 0/12    | 0/12  | 1/9     | 1/11  | 1/12    | 4/12  |
| RO, 0 $\mu$ M | 12/12   | 12/12 | 12/12   | 11/11 | 11/12   | 12/12 |
