# Supplementary material for: The role of retinoic acid signaling in starfish metamorphosis
Source: PubMed Central journal article supplement (PMC5910596; doi:10.1186/s13227-018-0098-x), 2018-04-21
Supplement: 13227_2018_98_MOESM7_ESM.pdf [file 13227_2018_98_MOESM7_ESM.pdf]

number of settled / treated larvae

| treatment     | batch 1 |       | batch 2 |       | batch 3 |       |
|---------------|---------|-------|---------|-------|---------|-------|
| plate         | 1       | 2     | 1       | 2     | 1       | 2     |
| RO, 1 $\mu$ M | 12/12   | 12/12 | 9/12    | 11/12 | 12/12   | 12/12 |
| RO, 0 $\mu$ M | 12/12   | 12/12 | 12/12   | 11/12 | 12/12   | 12/12 |
