# Supplementary material for: The role of retinoic acid signaling in starfish metamorphosis
Source: PubMed Central journal article supplement (PMC5910596; doi:10.1186/s13227-018-0098-x), 2018-04-21
Supplement: 13227_2018_98_MOESM8_ESM.pdf [file 13227_2018_98_MOESM8_ESM.pdf]

number of settled / treated larvae

| treatment        | batch 1 |       |       | batch 2 |       |       | batch 3 |       |       |
|------------------|---------|-------|-------|---------|-------|-------|---------|-------|-------|
| plate            | 1       | 2     | 3     | 1       | 2     | 3     | 1       | 2     | 3     |
| DEAB,300 $\mu$ M | 12/12   | 11/12 | 11/12 | 11/12   | 12/12 | 11/12 | 10/12   | 10/12 | 12/12 |
| DEAB,100 $\mu$ M | 12/12   | 9/12  | 12/12 | 12/12   | 12/12 | 12/12 | 11/12   | 9/12  | 10/12 |
| DEAB,0 $\mu$ M   | 12/12   | 12/12 | 12/12 | 12/12   | 11/12 | 12/12 | 11/12   | 9/12  | 11/12 |
