# Supplementary material for: The role of retinoic acid signaling in starfish metamorphosis
Source: PubMed Central journal article supplement (PMC5910596; doi:10.1186/s13227-018-0098-x), 2018-04-21
Supplement: 13227_2018_98_MOESM9_ESM.pdf [file 13227_2018_98_MOESM9_ESM.pdf]

number of metamorphosed / settled larvae

| treatment        | batch 1 |       |       | batch 2 |       |       | batch 3 |      |       |
|------------------|---------|-------|-------|---------|-------|-------|---------|------|-------|
| plate            | 1       | 2     | 3     | 1       | 2     | 3     | 1       | 2    | 3     |
| DEAB,300 $\mu$ M | 0/12    | 0/11  | 0/11  | 3/11    | 5/12  | 4/11  | 0/10    | 0/10 | 0/12  |
| DEAB,100 $\mu$ M | 11/12   | 8/9   | 10/12 | 12/12   | 12/12 | 12/12 | 9/11    | 5/9  | 10/10 |
| DEAB,0 $\mu$ M   | 10/12   | 12/12 | 9/12  | 12/12   | 11/11 | 12/12 | 11/11   | 9/9  | 11/11 |
